# Supplementary material
Source: PubMed Central journal article supplement (PMC4776012)
Supplement: AAC.02167-15_zac003164902so1.pdf [file AAC.02167-15_zac003164902so1.pdf]

1 **Table S1.** Primers for PCR, sequencing and RT-qPCR used in this study.

| Name              | Sequence 5'-3'         | Amplicon size (bp) | Reference  |
|-------------------|------------------------|--------------------|------------|
| <b>DNA gyrase</b> |                        |                    |            |
| gyrAs-QRDR        | TCCGTAATTGGCAAGACAAACG | 543                | This study |
| gyrAa-QRDR        | CGGCCATCAGTTCATGGGCA   |                    |            |
| gyrA741-1426s     | GGCAATGCGTTATACGGAAA   | 685                | This study |
| gyrA741-1426a     | GGTTCATGATCTTCGGCTGA   |                    |            |
| gyrA1376-1942s    | TCGGTATCAACATGGTGGCA   | 566                | This study |
| gyrA1376-1942a    | TACGACGTTTGTACCGAAC    |                    |            |
| gyrA1890-2490s    | GATCCGTGAAGAGCTGGAGC   | 600                | This study |
| gyrA1890-2490a    | ACCTTCAGCGGAGAACAGCA   |                    |            |
| gyrA2441-3089s    | TTGACCTGACCAGCGGCGAA   | 648                | This study |
| gyrA2441-3089a    | AAGCCCAGACTTTGCAGCCTG  |                    |            |
| gyrB-1-F          | TAAAAGCGACGCAATCACAG   | 968                | This study |
| gyrB-1-R          | TGCGGAATGTTGTTGGTAAA   |                    |            |
| gyrB-2-F          | GGCAAAGAAGACCACTTCCA   | 1233               | This study |

|          |                      |     |            |
|----------|----------------------|-----|------------|
| gyrB-2-R | AGAAAGGTCAGCTTCCGTCA |     |            |
| gyrB-3-F | TGGCGAAGCGTTAGAGAAAC | 877 | This study |
| gyrB-3-R | GGGATGATAATTGCGGATTG |     |            |
| parCs    | TCAGCGCCGCATTGTGTATG | 253 | This study |
| parCa    | CAACCGGGATTCGGTGTAAC |     |            |

### Regulators

|         |                          |            |            |
|---------|--------------------------|------------|------------|
| marR-F  | CTGTTCATGTTGCCTGCCAG     | 825        | (1)        |
| marR-R  | CAGTCCAAAATGCTATGAATGG   |            |            |
| robA-F  | CATCTGGACGCCCTGCATT      | 1172       | (2)        |
| robA-R  | AGCCAATGGCCCCAGCATTA     |            |            |
| acrR-F  | AAACCCATTGCTGCGTTTAT     | 821        | (1)        |
| acrR-R  | AAACCGCAAGAATATCACGA     |            |            |
| soxSR-F | GCGCTATTGCCAGGGATGGT     | 1071       | This study |
| soxSR-R | TGTGTTGACGTCGGGGGAAA     |            |            |
| soxS-F  | TTTCTGATGGGACATAAATCTGCC | sequencing | (1)        |
| plon-F  | CCTGCGTTCCATCGTAGAAG     | 531        | This study |

|           |                        |      |            |
|-----------|------------------------|------|------------|
| plon-R    | CCGTTGAAGCTTCTTTCTGC   |      |            |
| lon-end-F | GACCATTGAAACCGCATGTG   | 752  | (3)        |
| lon-end-R | GATCAATTGAGATTTATTCCTC |      |            |
| lon3      | CTATGAATCCTGAGCGTTCTG  | 729  | (3)        |
| lonR4     | CACCGAGTTCTTTCTGAATAGC |      |            |
| lon2      | AAAATGATGTCTCCGATGTCG  | 1107 | (3)        |
| lonR3     | CGCACGAACCACCGTTAA     |      |            |
| hns-F     | CGGTGTTATCCACGAAACG    | 670  | This study |
| hns-R     | ATTGGCGGCACAAAATAAAG   |      |            |
| gadEp-F   | G TTCAGCTTCGCCAGTTTGT  | 886  | This study |
| gadEp-R   | CTGCCAAAAGCCCTGTAAAA   |      |            |

### **Efflux pumps**

|         |                          |     |     |
|---------|--------------------------|-----|-----|
| acrA-1F | CACCGGCAGTTTGAGGATCG     | 814 | (2) |
| acrA-1R | GCGCGGATCAATCTGGCTTA     |     |     |
| acrA-2F | GTCGTTGCTGGACTGGGTCA     | 663 | (2) |
| acrA-2R | ATGAACAAAAACAGAGGGTTTACG |     |     |

|         |                          |     |     |
|---------|--------------------------|-----|-----|
| acrB-1F | TCAATGATGATCGACAGTATGGCT | 616 | (2) |
| acrB-1R | GGAACAACCTGGCGAGCAAAC    |     |     |
| acrB-2F | AGCGGAACGACCAGCATAAC     | 869 | (2) |
| acrB-2R | GCGGGACGTGGTCAGAATAC     |     |     |
| acrB-3F | CCAGCCTGGTCAATCAGCTC     | 816 | (2) |
| acrB-3R | GCGTGTTATGGCGGAAGAAG     |     |     |
| acrB-4F | CGAATACCGCCGACAGTACC     | 801 | (2) |
| acrB-4R | GGATGAACCCGAATGAGCTG     |     |     |
| acrB-5F | CAGGATTTTGCCGAACCTCTCA   | 822 | (2) |
| acrB-5R | ATAACCAGCAAGCCGCAAGC     |     |     |
| acrE-F  | ATAGCCGAAGTTCGCCCACA     | 952 | (2) |
| acrE-R  | CTGCGGGGGTATCGGTAGTG     |     |     |
| acrF-1F | CAGTCAGGCGATTGGCGATA     | 935 | (2) |
| acrF-1R | ACCACCGAGCCGTCACTGTT     |     |     |
| acrF-2F | CAGCGTTACCAGGGCAACAA     | 931 | (2) |
| acrF-2R | ATTTTGCCGACGCTGTTGGT     |     |     |

|           |                              |      |            |
|-----------|------------------------------|------|------------|
| acrF-3F   | CGCTGCTTAAACCCGTCTCTG        | 962  | (2)        |
| acrF-3R   | CAGTCGCGGAGAGCCATACA         |      |            |
| acrF-4F   | CGCTGGGTGGGACTTACGTT         | 851  | (2)        |
| acrF-4R   | TTATCCTTTAAAGCAACGGCGGA      |      |            |
| acrD-L1-F | TCATTGCCCGTTGAACAATA         | 969  | This study |
| acrD-L1-R | AACCAGAGCGATAGCTTCCA         |      |            |
| acrD-L2-F | GTGTTCCCTGTTCCCTGCGTTT       | 986  | This study |
| acrD-L2-R | AGCAAGGAAATGGCGTACAG         |      |            |
| acrS-F    | TTACATGACACTTAATTCATTCGTTTGA | 1321 | (2)        |
| acrS-R    | TGCACATCGCTGCCTTCAGT         |      |            |
| mdtF-F    | CACAAACCTAACGCCCTGTT         | 662  | This study |
| mdtF-R    | AACATCGGCGTATCTTCCAG         |      |            |
| mdtEp-F   | GAGCGACATCGTCACCCTGG         | 447  | (4)        |
| mdtEp-R   | GTCATCGCAGGCGGTGAGCA         |      |            |
| mdtF1-F   | CATTCGTCCGGGTATCAAAG         | 753  | This study |
| mdtF1-R   | AGTTGACCACCGGAAATCTG         |      |            |

|         |                       |     |            |
|---------|-----------------------|-----|------------|
| mdtF2-F | CAGATTTCCGGTGGTCAACT  | 921 | This study |
| mdtF2-R | TTCAAACAGCGTGTTGAAGC  |     |            |
| mdtF3-F | GTACCGCGTCAGGTTTTGAT  | 522 | This study |
| mdtF3-R | CGACCAGGTCTGCCATAAAT  |     |            |
| mdtF4-F | CATCCCGTCAATGGAGATTT  | 711 | This study |
| mdtF4-R | GCAGGAAAGAGTAAGGCTGAA |     |            |
| ydhE-F1 | CTTCTTTTTGCTGCCCATTC  | 696 | This study |
| ydhE-R1 | GAAACCATGGCAAGGAACAT  |     |            |
| ydhE-F2 | ATG TTCCTTGCCATGGTTTC | 919 | This study |
| ydhE-R2 | TCAACGTGTATATCCCCGGT  |     |            |
| ydhEp-F | TTCTCGTCAATCGACACCAG  | 360 | This study |
| ydhEp-R | GACAAAACCCATCGCAGTTT  |     |            |

### **LPS synthesis**

|        |                      |      |            |
|--------|----------------------|------|------------|
| rfaE-F | ATGAAAGTAACGCTGCC    | 1455 | (5)        |
| rfaE-R | GATCTGTGAACCGCTTTCC  |      |            |
| rfaH-F | CCACGGATGCTAATGTCAAA | 677  | This study |

|         |                        |      |            |
|---------|------------------------|------|------------|
| rfaH-R  | CCCATTATACGGCGTTCATC   |      |            |
| lpcA-1F | GTACTTCTCGCTTTTGGCGG   | 801  | (6)        |
| lpcA-1R | AATTTTCAGGTCGGATGCGG   |      |            |
| gmhB-F  | TCAGGTTTATGCGAAGAGCA   | 706  | This study |
| gmhB-R  | GAAGACAAGCGGAAAAATGC   |      |            |
| rfaD-F  | CAGACATTCGTGTCTGAGATTG | 1068 | This study |
| rfaD-R  | GGAGCGTGCGATAGAGACTT   |      |            |
| rfaF-F  | ATACATGGCCTGGCTGAATC   | 1147 | This study |
| rfaF-R  | GGGCAACGTATGGAGAACAT   |      |            |
| rfaC-1F | CACCGCCGCTATCCCATAAA   | 1367 | (6)        |
| rfaC-2R | AGAAAGGGGAAGAATAAGGT   |      |            |
| rfaL-F  | TGGTATGTAGGGCTCCAAGAG  | 1501 | This study |
| rfaL-R  | AATTTGGTCCCCGAATCATC   |      |            |
| rfaQ-F  | GCGCATAAAGTCACGTTGAA   | 1139 | This study |
| rfaQ-R  | TCGCTAGTGGAAAAGCCATT   |      |            |
| rfaG-F  | AGCATCTTTACCACGCCAAA   | 1219 | This study |

|        |                         |      |            |
|--------|-------------------------|------|------------|
| rfaG-R | GGAAAAGCTGTTGCCAGAAG    |      |            |
| rfaP-F | TTCATAATCTGCAACCCAATTT  | 995  | This study |
| rfaP-R | GAGAATGCTCGCCATTATGC    |      |            |
| rfaS-F | AGAAACAGCTTCGCCGATAA    | 1110 | This study |
| rfaS-R | TGAACATGGCAAGCGTTAAG    |      |            |
| rfaB-F | TTCCATAAGCGATGTCCAGA    | 1263 | This study |
| rfaB-R | TGATGTCAACGATTGTTTCTGA  |      |            |
| rfaI-F | ATGGCAGGAAATGAGTCCAC    | 1164 | This study |
| rfaI-R | CTGCGTCGATCGATGAATTT    |      |            |
| rfaJ-F | TTTCATCGGTAAAAACAACCAA  | 1243 | This study |
| rfaJ-R | GCTGAAACCGAACAATAGCA    |      |            |
| rfaY-F | AGGGCCCGAAAGAAAAATAA    | 917  | This study |
| rfaY-R | GAGTCTGTTATCTTTGCCGAAA  |      |            |
| rfaZ-F | TTCCTAAGCGCATTTTTATACCA | 995  | This study |
| rfaZ-R | GCGTTTGAAAGGGAAACCAG    |      |            |
| rfaU-F | CACGCAGCATTCCAATTATC    | 1298 | This study |



rfaU-R GACATCAGTGCAGAAGAATCAAA

**Others**

|           |                       |            |            |
|-----------|-----------------------|------------|------------|
| yoaA-F    | CGCCCTCATCCTGACATAAT  | 1994       | This study |
| yoaA-R    | ATAAAAAGGCGCGCATCATA  |            |            |
| yoaAseq-F | TTACAAAAGTGCGCTGATCG  | sequencing | This study |
| yoaAseq-R | AGCGTTGCTGAGGTGAAGAT  |            |            |
| surA-F    | TTACCACGTAATCCGCAGTG  | 1397       | This study |
| surA-R    | ACA ACTAAGTCCGGGCCAAT |            |            |
| topB1-F   | CGAGTTTGGCATTGAACTGA  | 945        | This study |
| topB1-R   | CGGATTCTGATTCCCGTTTA  |            |            |
| topB2-F   | GTCAACCGGCTATTGTCACC  | 1107       | This study |
| topB2-R   | TTTTCGCACTACGTTTACGC  |            |            |
| rbsA-F    | CAACAAACCGCAGAAAGTCA  | 1643       | This study |
| rbsA-R    | GAAATAACGGCGACCAGAGA  |            |            |
| rbsA-F2   | AATGGTTGAAATCGCCAAAG  | sequencing | This study |
| rbsA-R2   | AACGGGTAACGACTTCATGC  |            |            |

|                |                           |     |            |
|----------------|---------------------------|-----|------------|
| icdA-F         | GCGGTATTCGCTCTCTGAAC      | 844 | This study |
| icdA-R         | GTTACGGTTTTTCGCGTTGAT     |     |            |
| rpoB-F         | AGGTCGTCACGGTAACAAGG      | 803 | This study |
| rpoB-R         | TACCCAGCGAACGAATCTCT      |     |            |
| gudD-F         | GGTCAACAGCGTAGCGAAGT      | 736 | This study |
| gudD-R         | CAAACGGTTCTTTGGTCAGG      |     |            |
| ygeG-F         | GTGATGAATGGGCAAATCAA      | 425 | This study |
| ygeG-R         | TTCAATATATGCCTGCGCTTT     |     |            |
| pYejA-F        | ACAGGCGCGATGGCTAAG        | 408 | This study |
| pYejA-R        | CGGTTGAAATTATCGAAGGTG     |     |            |
| sdhC-F         | CGTCAGGACGATAGCGGTAG      | 721 | This study |
| sdhC-R         | TTGTAATGATTTTGTGAACAGCCTA |     |            |
| EIE38512-F     | CTCACCAGCATTTCGTGTTC      | 254 | This study |
| EIE38512-R     | GAACGGCCTCAGTAGTCTCG      |     |            |
| <b>RT-qPCR</b> |                           |     |            |
| mdh-F          | TGACCAAACGCATCCAGAAC      | 118 | (7)        |

|            |                           |     |      |
|------------|---------------------------|-----|------|
| mdh-R      | GCACGAACCAGAGACAGACC      |     |      |
| rpsL-F     | GCAAAAACGTGGCGTATGTACTC   | 104 | (8)  |
| rpsL-R     | TTCGAAACCGTTAGTCAGACGAA   |     |      |
| RTqnrA-F   | ACGCCAGGATTTGAGTGACAGCC   | 118 | (9)  |
| RTqnrA-R   | GGCGCCGCTTTCAATGAAACTGC   |     |      |
| RTblaFOX-F | AACATGGGGTATCAGGGAGATG    | 190 | (10) |
| RTblaFOX-R | CAAAGCGCGTAACCGGATTGG     |     |      |
| RTsul1-F   | CACCGGAAACATCGCTGCA       | 158 | (11) |
| RTsul1-R   | AAGTTCCGCCGCAAGGCT        |     |      |
| RTacrA-F   | CTTAGCCCTAACAGGATGTG      | 189 | (12) |
| RTacrA-R   | TTGAAATTACGCTTCAGGAT      |     |      |
| RTmdfA-F   | CATTGGCAGCGATCTCCTTT      | 103 | (8)  |
| RTmdfA-R   | TTATAGTCACGACCGACTTCTTTCA |     |      |
| RTydhE-F   | CTGGCGGCAGCGGTAA          | 108 | (8)  |
| RTydhE-R   | TGCCATACAGACACCCACCATA    |     |      |
| RTacrE-F   | CCTCCTGCCCTCCTTTATTCTG    | 100 | (2)  |

|          |                          |     |            |
|----------|--------------------------|-----|------------|
| RTacrE-R | AACGGTAACCTGCGGTTAC      |     |            |
| RTtolC-F | GGTACGTTGAACGAGCAGGATC   | 116 | (2)        |
| RTtolC-R | CCATCAGCAATAGCATTCTGTTCC |     |            |
| RTmdtE-F | AATGTCACCTCGCCGATTAC     | 199 | (13)       |
| RTmdtE-R | TGCCCTGAACCTGTTTGATT     |     |            |
| RTmdtF-F | CCGTACCGGTGGTTATTCTC     | 193 | (13)       |
| RTmdtF-R | ATCGATTTATGCGTCGCTTC     |     |            |
| RTmarA-F | CATAGCATTTTGGACTGGAT     | 170 | (12)       |
| RTmarA-R | TACTTTCCTTCAGCTTTTGC     |     |            |
| RTSoxS-F | CCATTGCGATATCAAAAATC     | 210 | (12)       |
| RTSoxS-R | ATCTTATCGCATGGATTGAC     |     |            |
| RTfis-F  | CGGTAAACAGGCACTGAAGA     | 134 | This study |
| RTfis-R  | CTGGTTACCACGGGTGTATTG    |     |            |
| RTdsrA-F | CATCAGATTTCTGGTGTAACGAA  | 65  | This study |
| RTdsrA-R | GGTCGGGATGAAACTTGCT      |     |            |
| RTevgA-F | TGCTATTTCCCCTTCTCTCAACC  | 84  | (13)       |

|                       |                                 |            |            |
|-----------------------|---------------------------------|------------|------------|
| RTevgA-R              | TTCTTGTTTCGATAAGGAGTCGAGTT      |            |            |
| RTompF-F              | ACGCTGACGTTGGTTCTTTC            | 190        | This study |
| RTompF-R              | AAGTTCAGGCCATCAACCAG            |            |            |
| RTompC-F              | TACGGCCAGTGGGAATATCA            | 165        | This study |
| RTompC-R              | CAGTACGTCGGTCCAGGAAG            |            |            |
| <b>pRS415 cloning</b> |                                 |            |            |
| pYejA-F               | GGCCCGgaattcGATTAGCCGCCCGTTACC  | 176        | This study |
| pYejA-R               | CACCGCCggatccCTGCAACGGATTCCTTT  |            |            |
| pYejAmut-R            | CACCGCCggatccCTGTAACGGATTCCTTT  |            |            |
| pSdhC-F               | GGCCCGgaattcCGACAAACTATATGTAGG  | 264        | This study |
| pSdhC-R               | CACCGCCggatccGCTGTTCTTATTATCCCT |            |            |
| pRS415-Rn             | GGCCTCTTCGCTATTACGC             | sequencing | This study |

2

3

4

5

- 6 1. **Watanabe R, Doukyu N.** 2012. Contributions of mutations in *acrR* and *marR* genes to organic solvent tolerance in  
7 *Escherichia coli*. *AMB Express* **2**:58.
- 8 2. **Sato T, Yokota S, Uchida I, Okubo T, Usui M, Kusumoto M, Akiba M, Fujii N, Tamura Y.** 2013. Fluoroquinolone  
9 resistance mechanisms in an *Escherichia coli* isolate, HUE1, without quinolone resistance-determining region mutations. *Front*  
10 *Microbiol* **4**:Doi: 10.3389/fmicb.2013.00125.
- 11 3. **Nicoloff H, Perreten V, Levy SB.** 2007. Increased genome instability in *Escherichia coli lon* mutants: relation to emergence  
12 of multiple-antibiotic-resistant (Mar) mutants caused by insertion sequence elements and large tandem genomic amplifications.  
13 *Antimicrob Agents Chemother* **51**:1293-1303.
- 14 4. **Eguchi Y, Oshima T, Mori H, Aono R, Yamamoto K, Ishihama A, Utsumi R.** 2003. Transcriptional regulation of drug  
15 efflux genes by EvgAS, a two-component system in *Escherichia coli*. *Microbiology* **149**:2819-2828.
- 16 5. **Valvano MA, Marolda CL, Bittner M, Glaskin-Clay M, Simon TL, Klena JD.** 2000. The *rfaE* gene from *Escherichia coli*  
17 encodes a bifunctional protein involved in biosynthesis of the lipopolysaccharide core precursor ADP-L-glycero-D-manno-  
18 heptose. *J Bacteriol* **182**:488-497.
- 19 6. **Linkevicius M, Sandegren L, Andersson DI.** 2013. Mechanisms and fitness costs of tigecycline resistance in *Escherichia*  
20 *coli*. *J Antimicrob Chemother* **68**:2809-2819.

- 21 7. **Okumura R, Liao CH, Gavin M, Jacoby GA, Hooper DC.** 2011. Quinolone Induction of *qnrVS1* in *Vibrio splendidus* and  
22 plasmid-carried *qnrS1* in *Escherichia coli*, a mechanism independent of the SOS system. Antimicrob Agents Chemother  
23 **55:5942-5945.**
- 24 8. **Swick MC, Morgan-Linnell SK, Carlson KM, Zechiedrich L.** 2011. Expression of multidrug efflux pump genes *acrAB-*  
25 *tolC*, *mdfA*, and *norE* in *Escherichia coli* clinical isolates as a function of fluoroquinolone and multidrug resistance.  
26 Antimicrob Agents Chemother **55:921-924.**
- 27 9. **Kim HB, Park CH, Gavin M, Jacoby GA, Hooper DC.** 2011. Cold shock induces *qnrA* expression in *Shewanella algae*.  
28 Antimicrob Agents Chemother **55:414-416.**
- 29 10. **Brolund A, Wisell KT, Edquist PJ, Elfstrom L, Walder M, Giske CG.** 2010. Development of a real-time SYBRGreen PCR  
30 assay for rapid detection of acquired AmpC in *Enterobacteriaceae*. J Microbiol Methods **82:229-233.**
- 31 11. **Luo Y, Mao D, Rysz M, Zhou Q, Zhang H, Xu L, P JJA.** 2010. Trends in antibiotic resistance genes occurrence in the  
32 Haihe River, China. Environ Sci Technol **44:7220-7225.**
- 33 12. **Viveiros M, Dupont M, Rodrigues L, Couto I, Davin-Regli A, Martins M, Pages JM, Amaral L.** 2007. Antibiotic stress,  
34 genetic response and altered permeability of *E. coli*. PLoS One **2:e365.**
- 35 13. **Bohnert JA, Schuster S, Fahrnich E, Trittler R, Kern WV.** 2007. Altered spectrum of multidrug resistance associated with  
36 a single point mutation in the *Escherichia coli* RND-type MDR efflux pump YhiV (MdtF). J Antimicrob Chemother **59:1216-**  
37 **1222.**
